# Supplementary material for: One-dimensional ZnO micro/nanostructures: deep insight into the growth mechanism and fine control of the microscopic morphology
Source: Royal Society of Chemistry journal article supplement (doi:10.1039/d1dt00127b), 2021-01-01
Supplement: d1dt00127b1.pdf [file d1dt00127b1.pdf]

## Electronic Supplementary Information

### **One-dimensional ZnO micro/nanostructures: deep insight into the growth mechanism and fine control of the microscopic morphology**

*Leshuang Wang<sup>a</sup>, Yuling Wei<sup>b</sup>, Changlong Chen<sup>\*a</sup> and Shu Yang<sup>a</sup>*

*<sup>a</sup>School of Chemistry and Chemical Engineering, University of Jinan, No. 336, West Road of Nan Xinzhuang, Jinan, 250022, Shandong, PR China. E-mail: chm\_chencl@ujn.edu.cn*

*<sup>b</sup>State Key Laboratory of Biobased Material and Green Papermaking, Qilu University of Technology (Shandong Academy of Sciences), No. 3501, Daxue Road, Changqing District, Jinan 250353, Shandong, PR China*

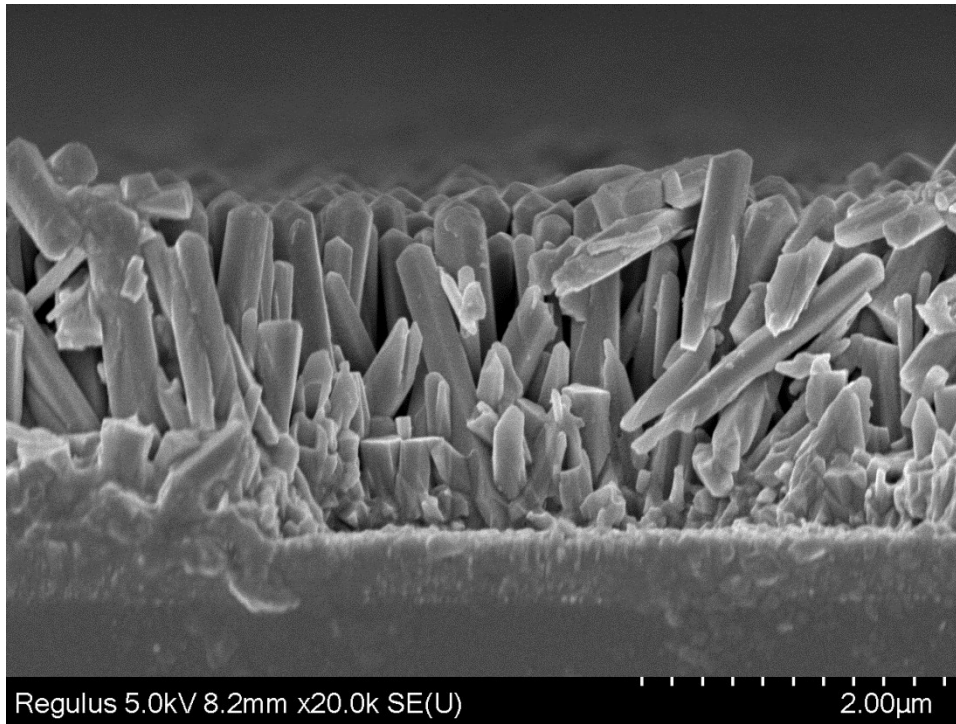

Fig. S1 Cross-section SEM image of the ZnO hexagonal prisms grown on FTO substrate prepared with 0.06 M  $\text{Zn}(\text{NO}_3)_2$  at 95°C for 2h.
